# Supplementary material for: Synergistic effect of cobalt, nitrogen-codoped hollow carbon sphere hosts for high performance lithium sulfur batteries
Source: Royal Society of Chemistry journal article supplement (doi:10.1039/d0nj00787k), 2020-01-01
Supplement: d0nj00787k1.pdf [file d0nj00787k1.pdf]

## Electronic Supplementary Information

### **Synergistic Effect of Cobalt, Nitrogen-Codoped Hollow Carbon Sphere Hosts for High Performance Lithium Sulfur Batteries**

Qihua Li,<sup>ab</sup> Jian Yang,<sup>c</sup> Yue Zhao,<sup>ab</sup> Zengcheng Zhang,<sup>b</sup> Chao Wang,<sup>b</sup> Hao He,<sup>\*a</sup> Jinghua Wu<sup>\*bd</sup>  
and Xiayin Yao<sup>bd</sup>

<sup>a</sup>*Key Laboratory of Material Physics of Ministry of Education, School of Physics and Microelectronics, Zhengzhou University, Zhengzhou, Henan 450001, P. R. China. E-mail: hehao@zzu.edu.cn*

<sup>b</sup>*Ningbo Institute of Materials Technology and Engineering, Chinese Academy of Sciences, Ningbo, Zhejiang 315201, P. R. China. E-mail: wujh@nimte.ac.cn*

<sup>c</sup>*School of Economics and Management, Ningbo University of Technology, Ningbo 315211, P. R. China.*

<sup>d</sup>*University of Chinese Academy of Sciences, Beijing 100049, P. R. China*

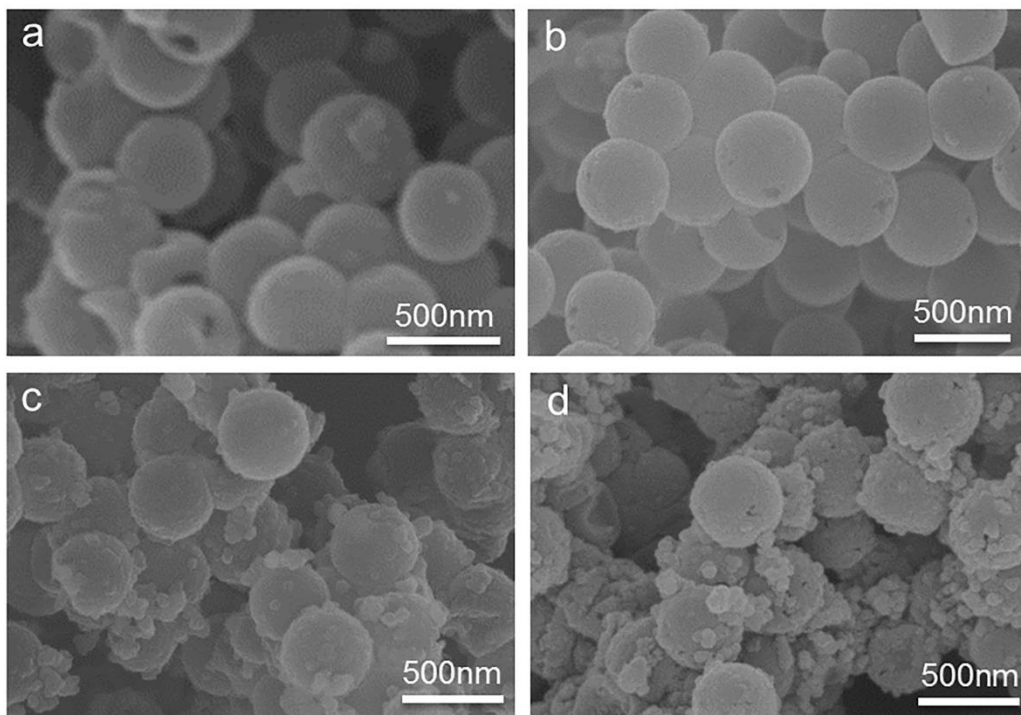

**Fig. S1** SEM images of (a) Co-0.6, N@CPDA-HCS, (b) Co, N @CPDA-HCS, (c) Co-2.4, N@CPDA-HCS and (d) Co-3, N@CPDA-HCS.

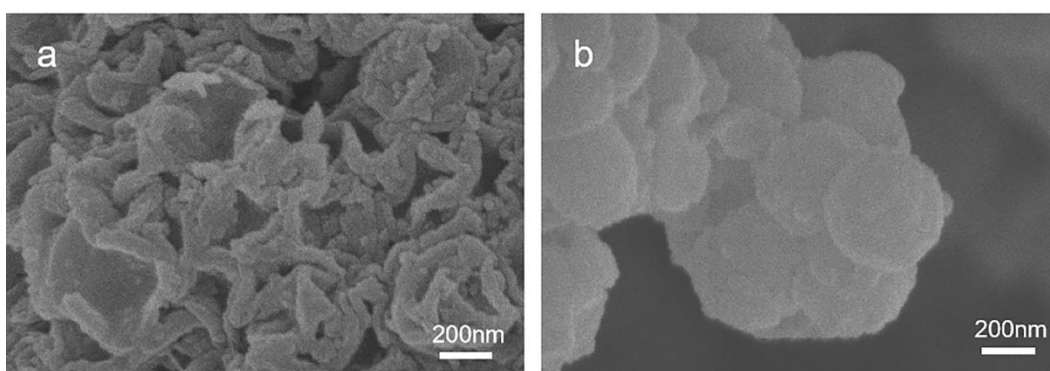

**Fig. S2** SEM images of (a) the S/N@CPDA and (b) S/Co, N@CPDA-HCS.

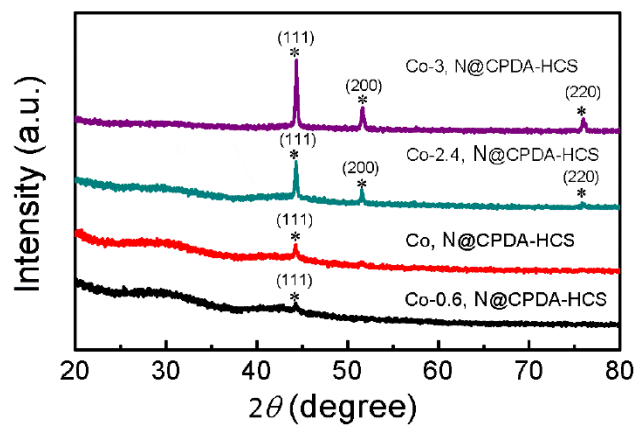

**Fig. S3** XRD patterns of Co-0.6, N@CPDA-HCS, Co, N@CPDA-HCS, Co-2.4, N@CPDA-HCS and Co-3, N@CPDA-HCS.

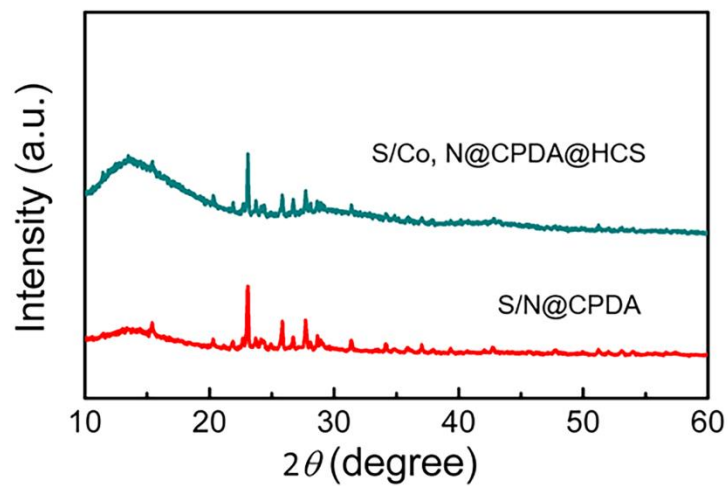

**Fig. S4** XRD patterns of S/N@CPDA and S/Co, N@CPDA-HCS.

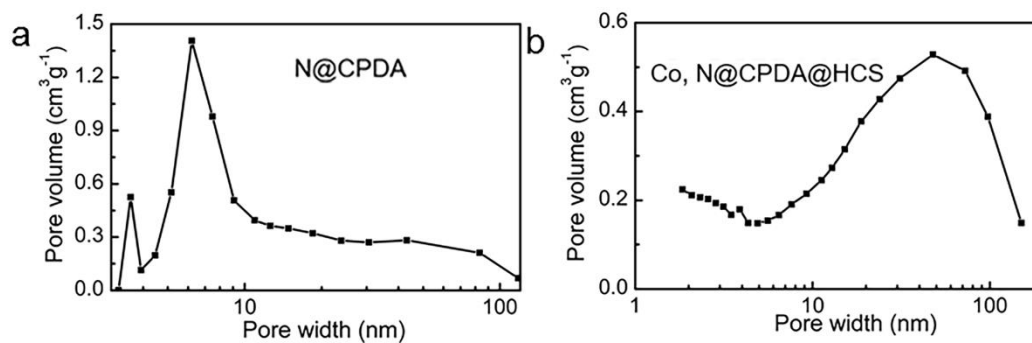

**Fig. S5** Aperture distribution curve of (a) N@CPDA and (b) Co, N@CPDA-HCS.

**Table S1** BET parameters of N@CPDA and Co, N@CPDA-HCS.

| Material       | BET surface area(m²g⁻¹) | Total pore volume(cm³g⁻¹) | Average pore diameter(nm) |
|----------------|-------------------------|---------------------------|---------------------------|
| N@CPDA         | 190                     | 0.61                      | 16.42                     |
| Co, N@CPDA-HCS | 456                     | 0.64                      | 13.36                     |

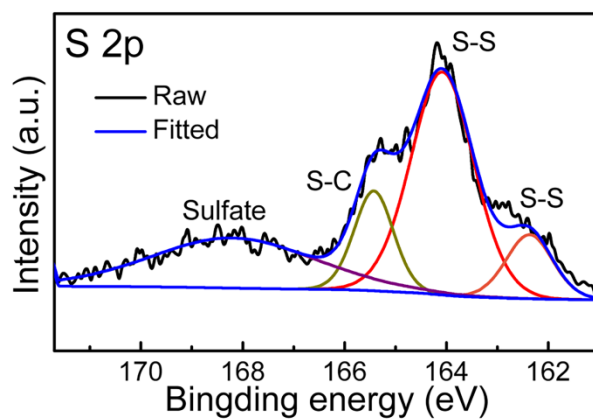

**Fig. S6** High-resolution XPS spectra of S 2p in S/Co, N@CPDA-HCS.

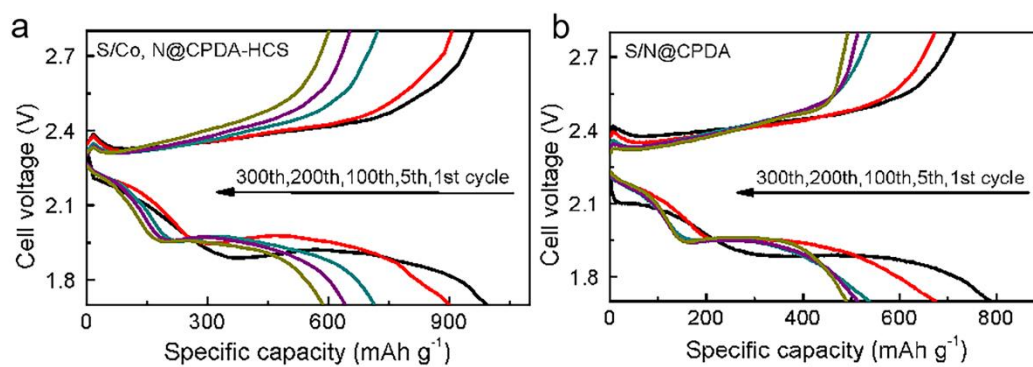

**Fig. S7** Charge and discharge voltage profiles of (a) S/Co, N@CPDA-HCS and (b) S/N@CPDA.

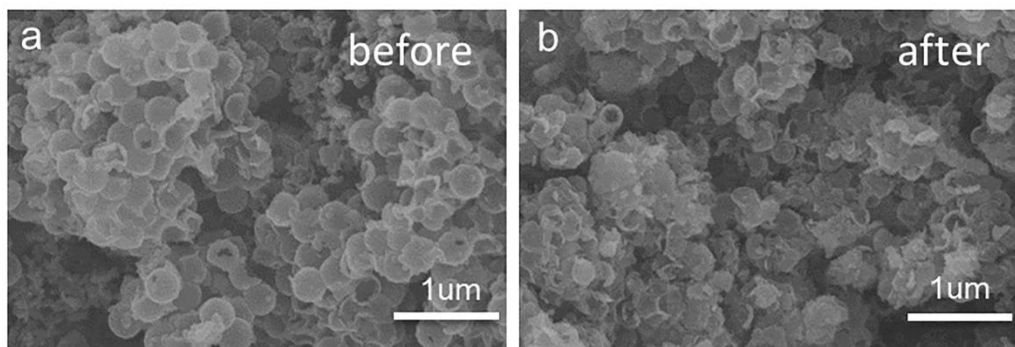

**Fig. S8** SEM images of S/Co, N@CPDA-HCS before (a) and after (b) cycling.

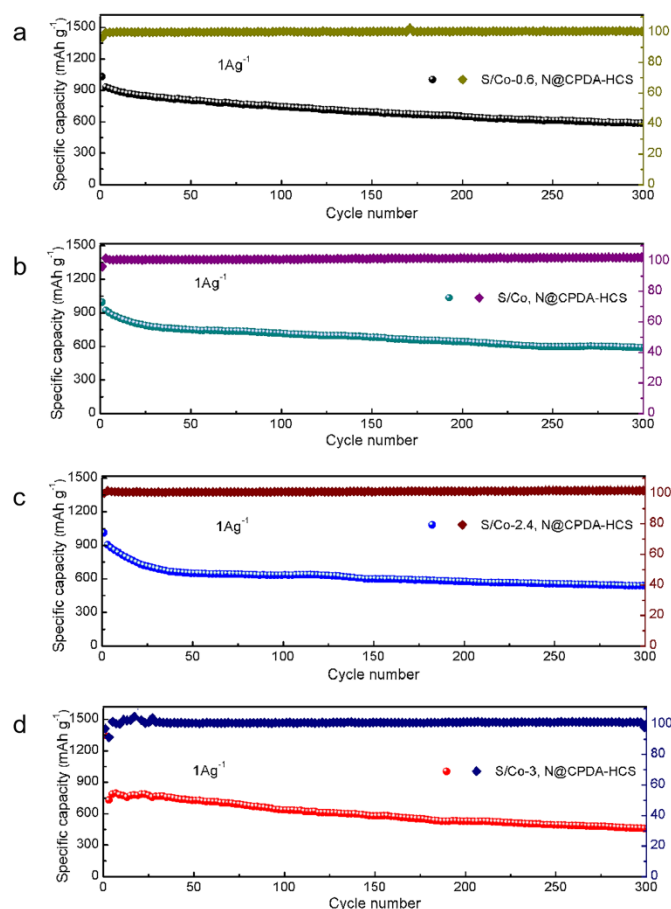

**Fig. S9** Cycling performances of (a) S/Co-0.6, N@CPDA-HCS, (b) S/Co, N@CPDA-HCS, (c) S/Co-2.4, N@CPDA-HCS and (d) S/Co-3, N@CPDA-HCS tested at a current density of 1 A g<sup>-1</sup>.

**Table S2** Component parameters of the equivalent circuit corresponding to EIS.

| Electrodes       | $R_s(\Omega)$ | $R_{ct}(\Omega)$ |
|------------------|---------------|------------------|
| S/N@CPDA         | 4.616         | 174.5            |
| S/Co, N@CPDA-HCS | 2.523         | 99.31            |

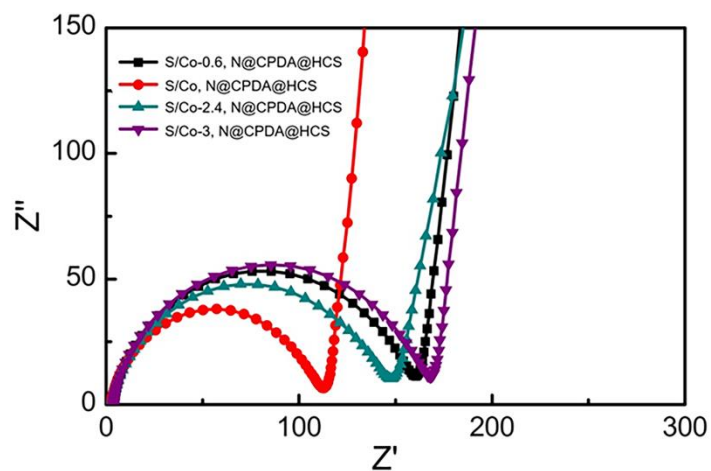

**Fig. S10** EIS plots of the S/Co-0.6, N@CPDA-HCS, S/Co, N@CPDA-HCS, S/Co-2.4, N@CPDA-HCS and S/Co-3, N@CPDA-HCS.
